# Supplementary material
Source: Elsevier journal article supplement (https://www.sciencedirect.com/science/article/pii/S2254887422000327)
Supplement: mmc1 [file S2254887422000327:mmc1.pdf]

## Appendix. Supplementary tables

**Supplementary table 1.** Key words used with their corresponding DeCS and MeSH terms.

| DeCS                                               | MeSH                                 |
|----------------------------------------------------|--------------------------------------|
| Valoración de la necesidad de cuidados de la salud | <i>Assessment of healthcare need</i> |
| Actividades de la vida diaria                      | <i>Activities of daily living</i>    |
| Valoración geriátrica                              | <i>Geriatric assessment</i>          |

DeCS: health sciences descriptors; MeSH: *Medical Subject Headings*.

**Supplementary table 2.** Reproducible search equation and filters used in the search

| Reproducible search equation                                                                                                                                                                                                                                                                                                                                                                                                                                                                                                                                 | Filters used in the search equation                             |
|--------------------------------------------------------------------------------------------------------------------------------------------------------------------------------------------------------------------------------------------------------------------------------------------------------------------------------------------------------------------------------------------------------------------------------------------------------------------------------------------------------------------------------------------------------------|-----------------------------------------------------------------|
| (assessment of healthcare needs[MeSH Terms]) OR (activities of daily living[MeSH Terms])) OR (geriatric assessment[MeSH Terms])) AND (Barthel[Title/Abstract])) OR (Katz[Title/Abstract])) OR (Lawton[Title/Abstract] AND Brody[Title/Abstract])) OR (Geriatric Depression Scale[Title/Abstract])) OR (clock drawing tests[Title/Abstract])) OR (Mini Mental State Examination[Title/Abstract])) OR (Older Americans Resources[Title/Abstract]) Filters: Review, Systematic Review, Humans, Aged: 65+ years, from 1950/1/1 - 3000/12/12 Sort by: Most Recent | Human<br>Aged 65+<br>Reviews with or without systematic methods |
